# Supplementary material
Source: PubMed Central journal article supplement (PMC3303926)

# Supporting information

Perturbing pro-survival proteins using quinoxaline derivatives: A structure activity relationship study

Rajkumar Rajule<sup>a, #</sup>, Vashti C. Bryant<sup>a, #</sup>, Hernando Lopez<sup>a, #</sup>, Xu Luo<sup>a</sup> and Amarnath Natarajan<sup>a, b, \*</sup>

<sup>a</sup>*Eppley Institute for Cancer Research*, <sup>b</sup>*Department of Pharmaceutical Sciences, University of Nebraska Medical Center, Omaha, NE 68198*

## Table of content

|                                                                                    |                |
|------------------------------------------------------------------------------------|----------------|
| <b>Representative images for Figure 4</b>                                          | <b>S2-S5</b>   |
| <b>Representative images for Figure 6</b>                                          | <b>S6</b>      |
| <b>Images corresponding to Figure 9</b>                                            | <b>S7-S9</b>   |
| <b><sup>1</sup>H-NMR 500 MHz, <sup>13</sup>C-NMR 125 MHz, LC-MS of compound 1h</b> | <b>S10-S13</b> |

---

\* Amarnath Natarajan. Tel.: +1-402-559-3793; fax: +1-402-559-8270; e-mail: [anatarajan@unmc.edu](mailto:anatarajan@unmc.edu).<sup>#</sup> Equal contribution

**Figure S1:** Representative images for Figure 4.

Untreated

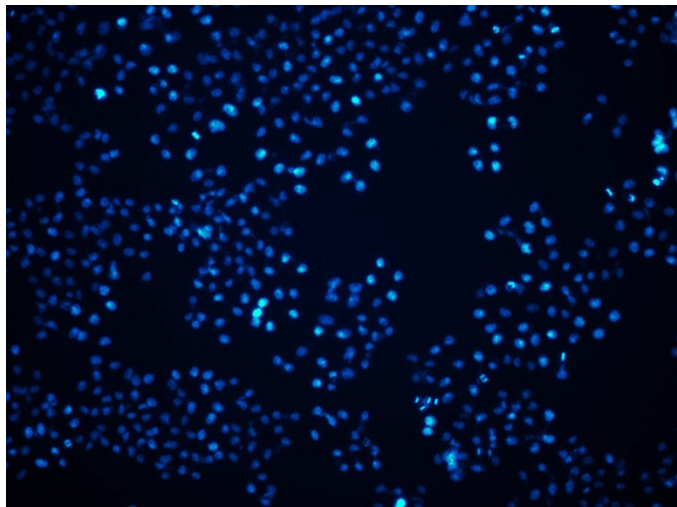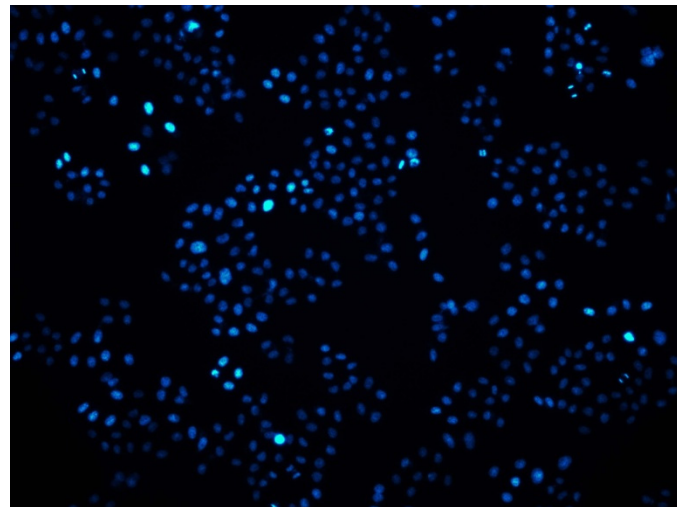

- Dox

+ Dox

DMSO

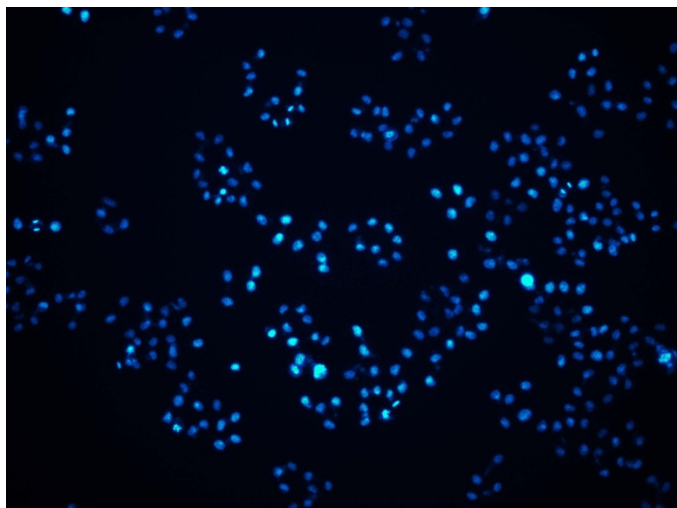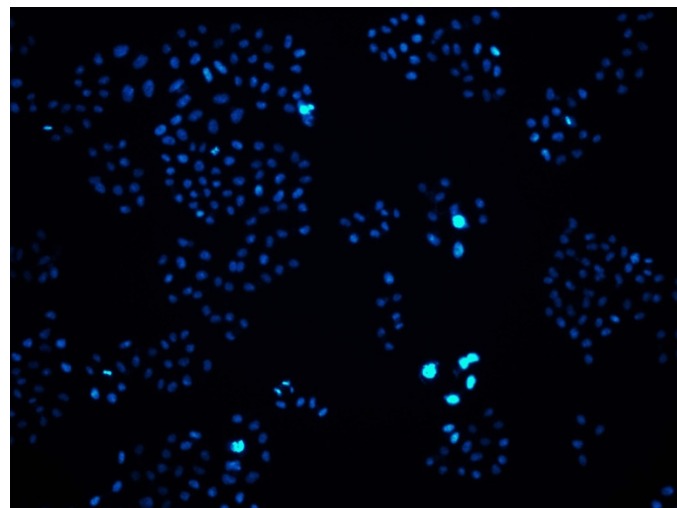

- Dox

+ Dox

Camptothecin (50  $\mu$ M)

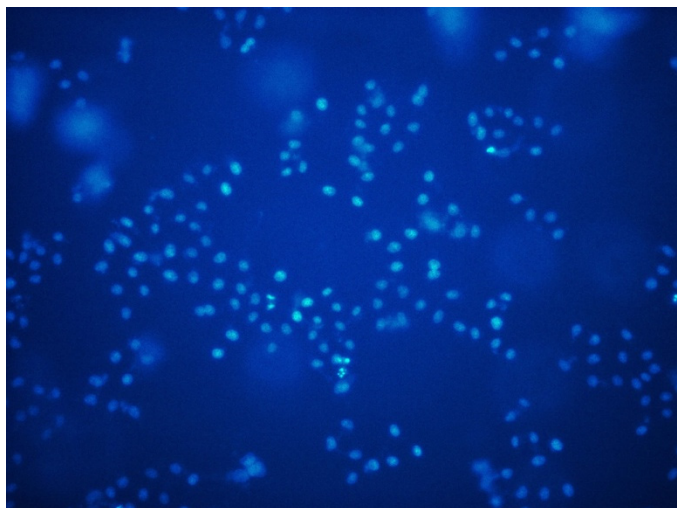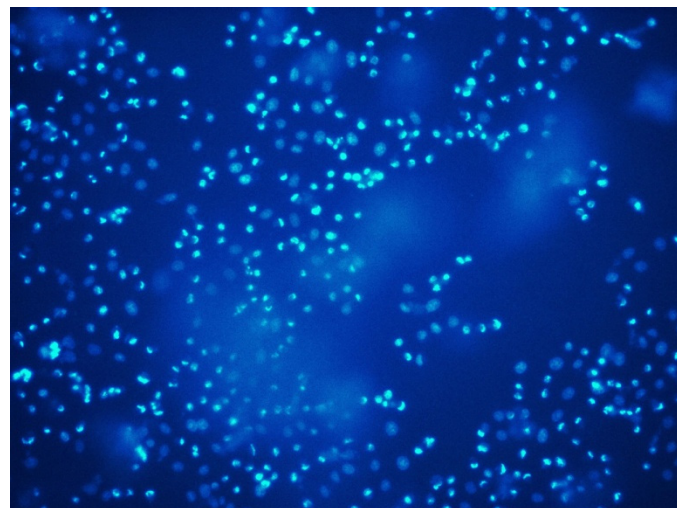

- Dox

+ Dox

**1h** (10  $\mu$ M)

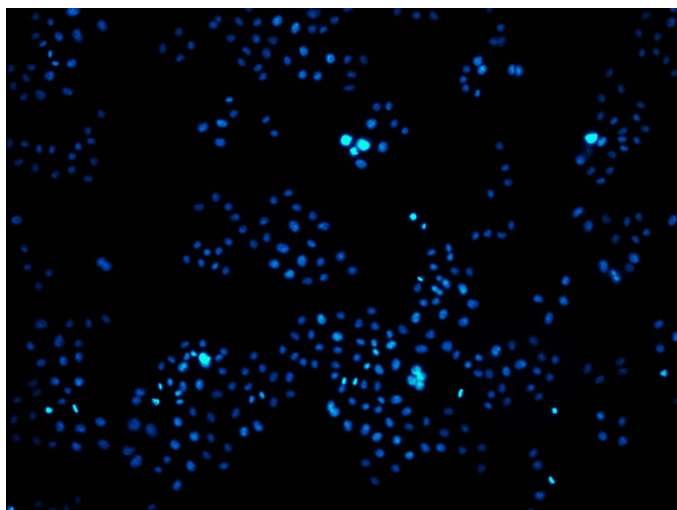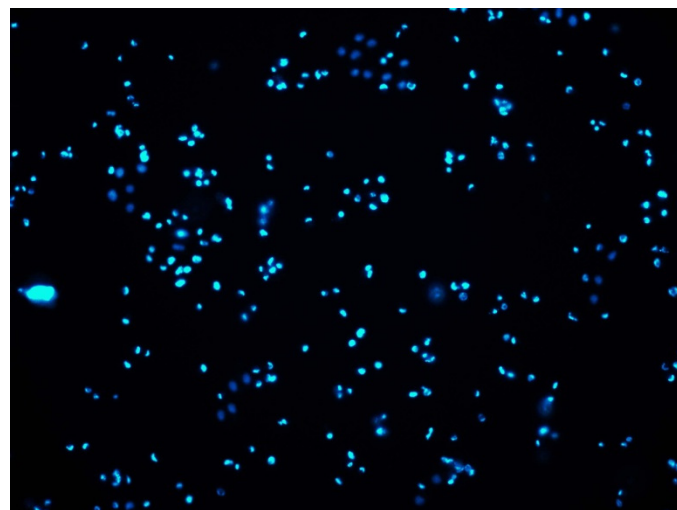

- Dox

+ Dox

**1p** (10  $\mu$ M)

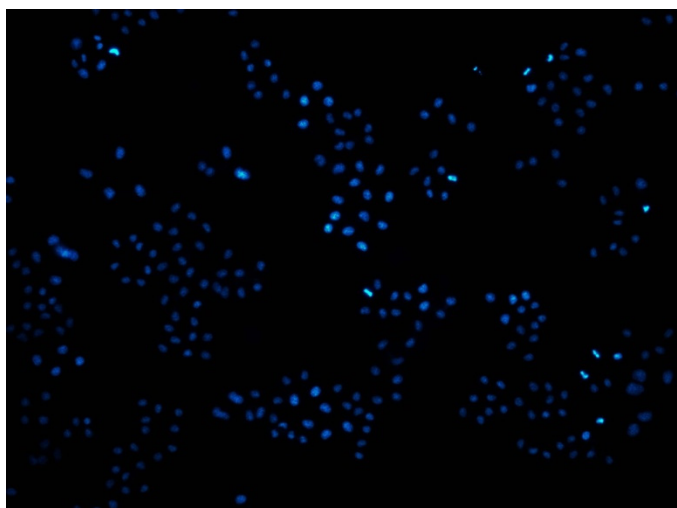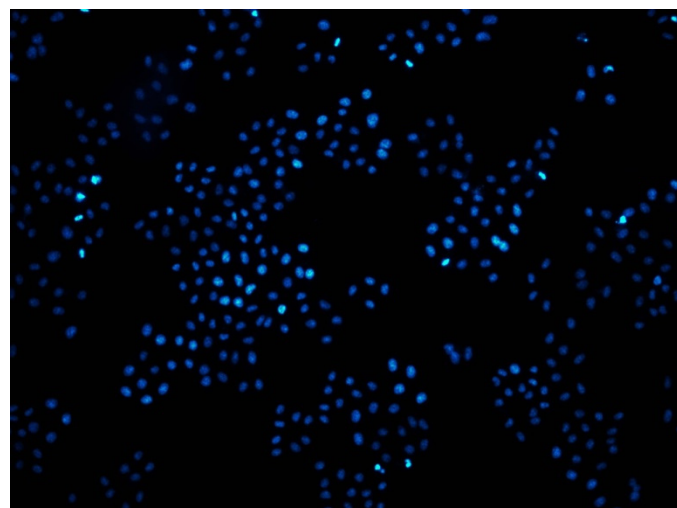

- Dox

+ Dox

**1q** (10  $\mu$ M)

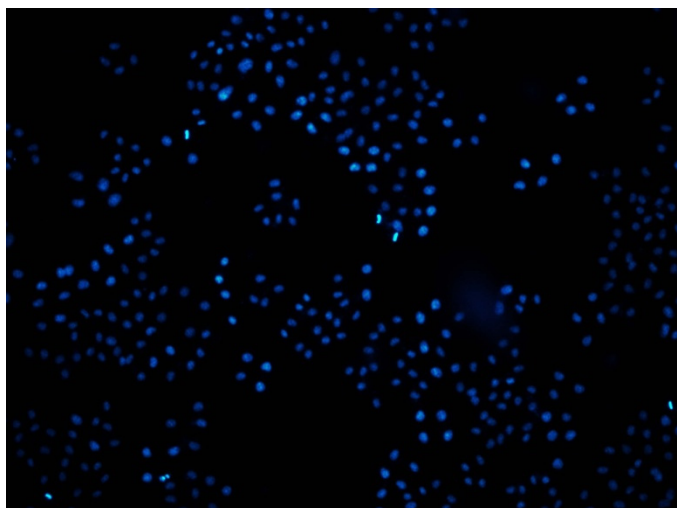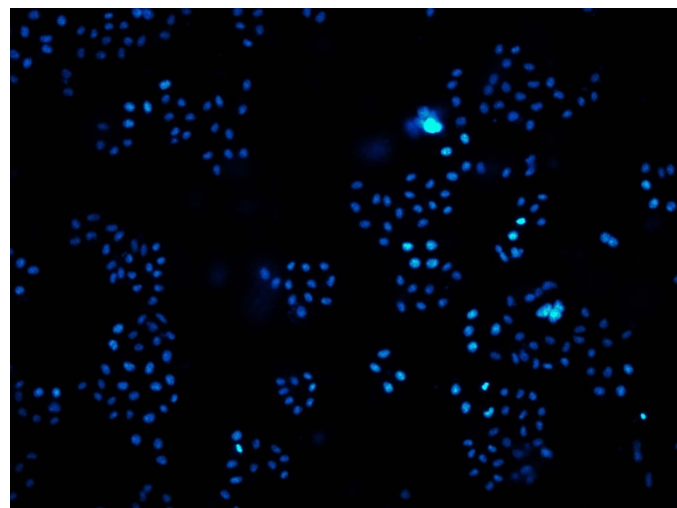

- Dox

+ Dox



**1r** (10  $\mu$ M)

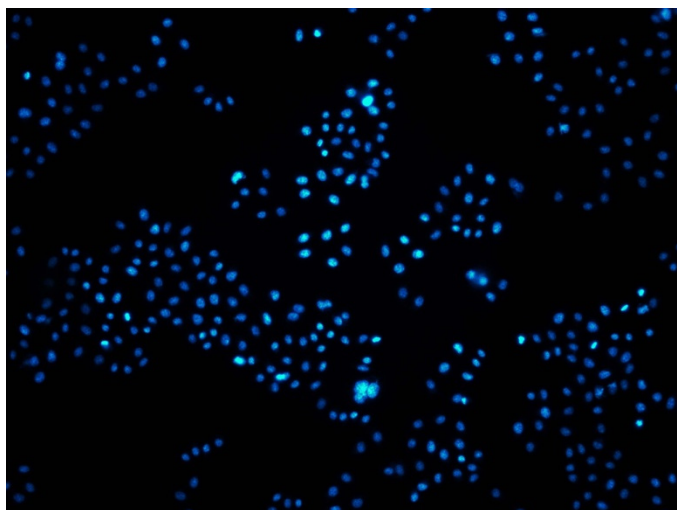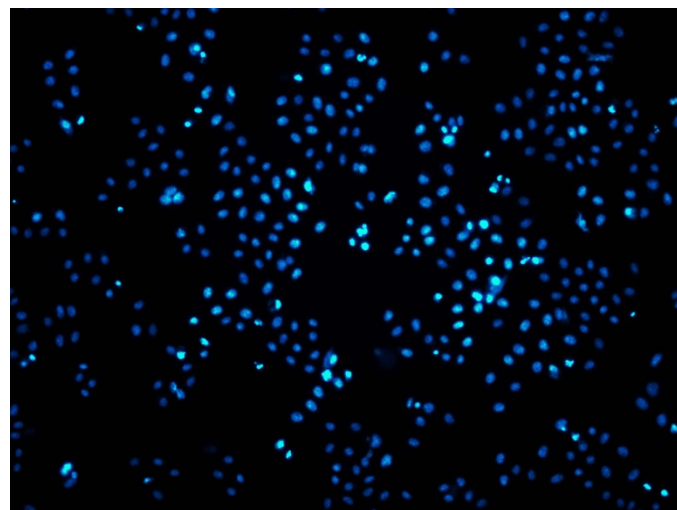

- Dox

+ Dox

**1s** (10  $\mu$ M)

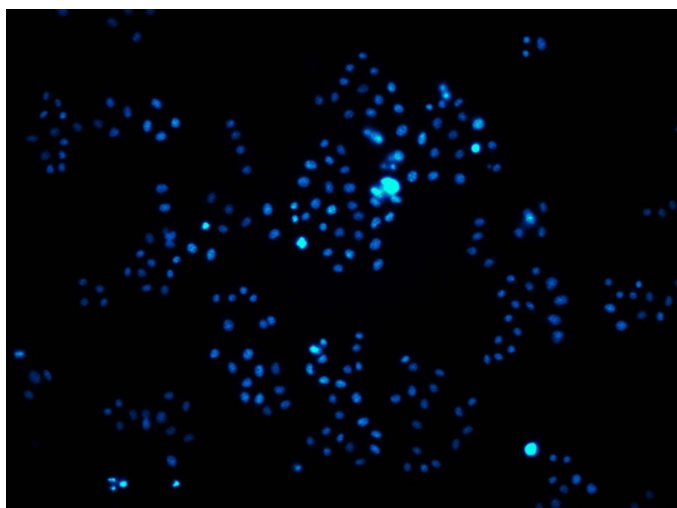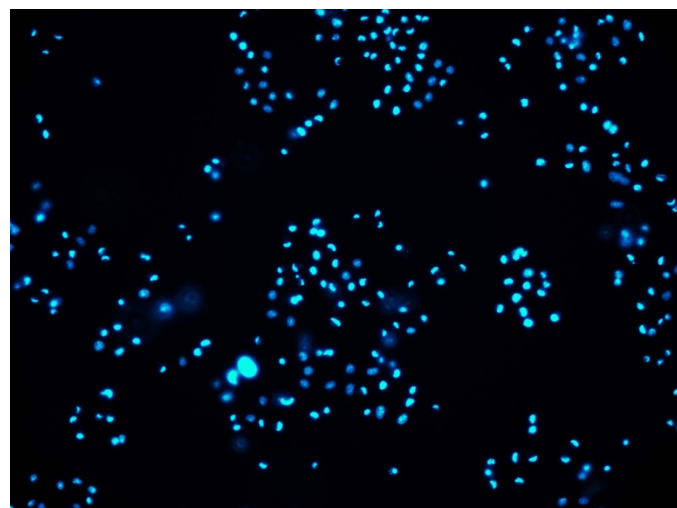

- Dox

+ Dox

**1t** (10  $\mu$ M)

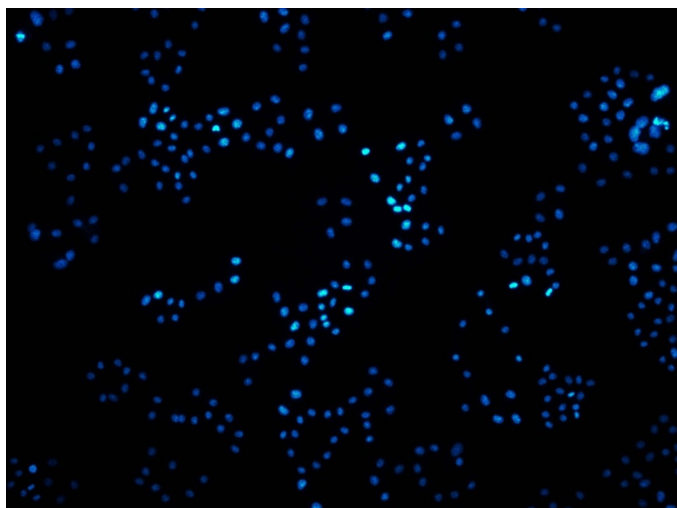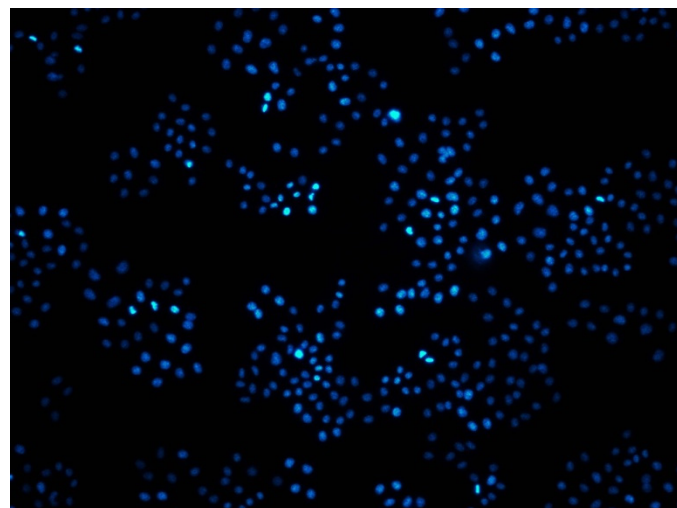

- Dox

+ Dox

**1u** (10  $\mu$ M)

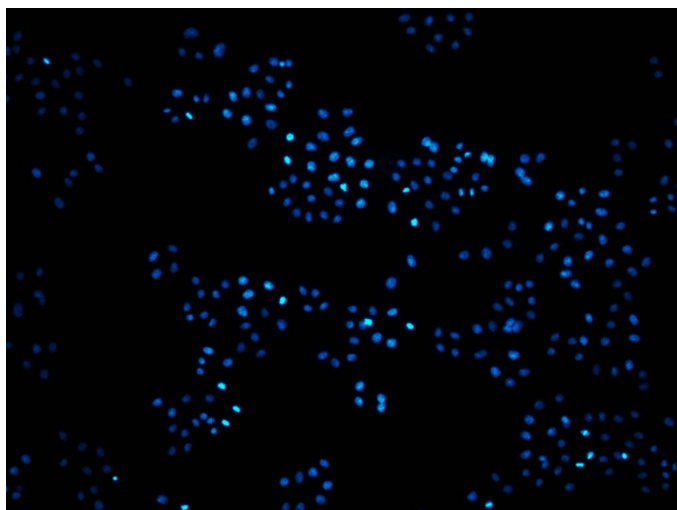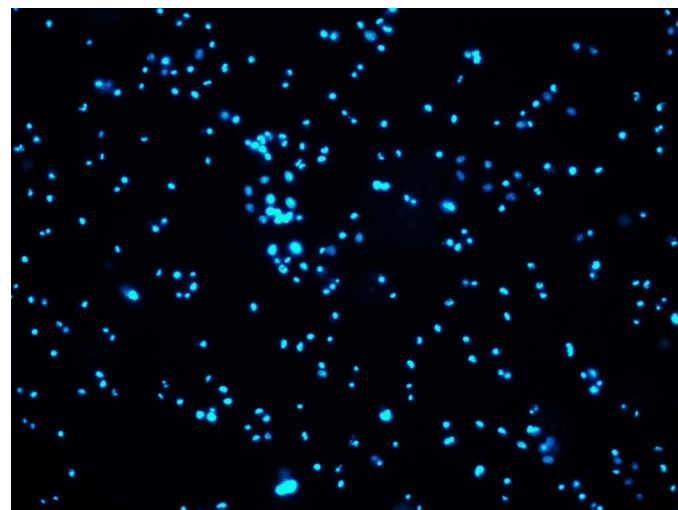

- Dox

+ Dox

**1v** (10  $\mu$ M)

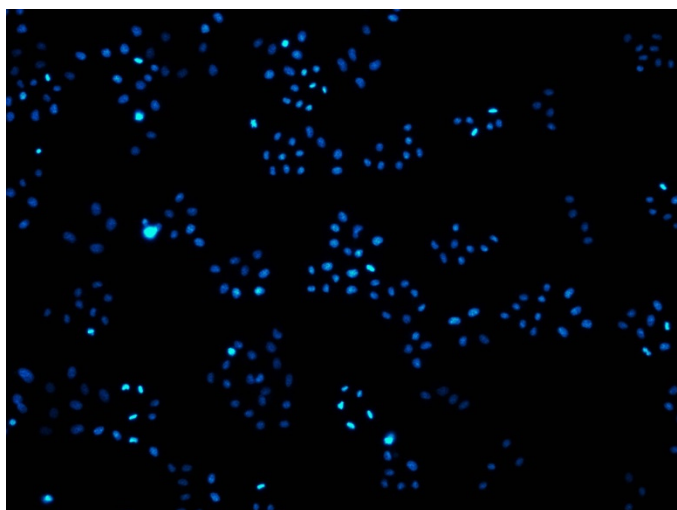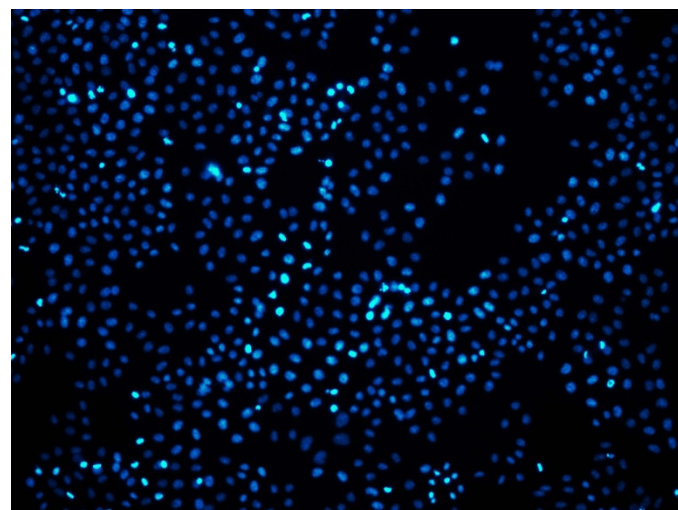

- Dox

+ Dox



**Figure S2:** Representative images that correspond to Figure 6

Untreated

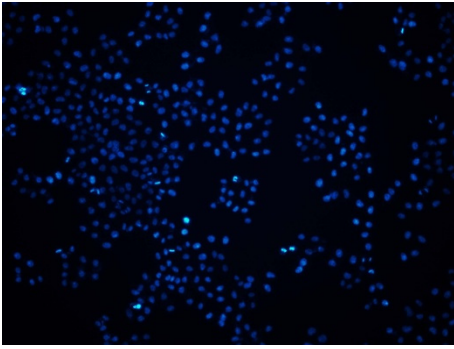

Dox-GFP

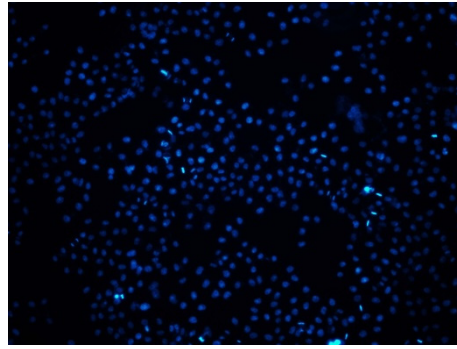

Dox-Noxa

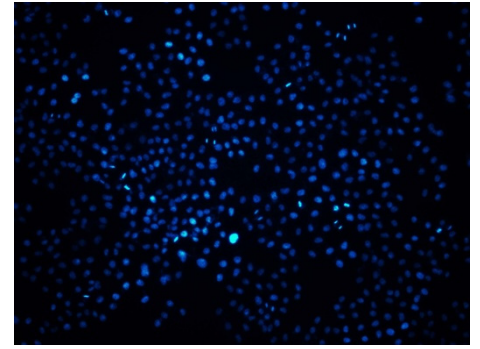

Dox-Bad3SA

Dox + DMSO

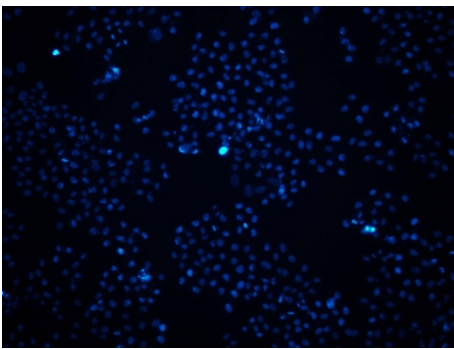

Dox-GFP

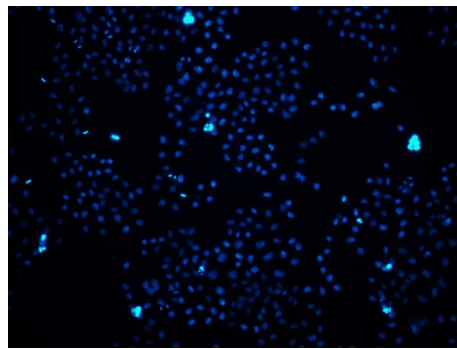

Dox-Noxa

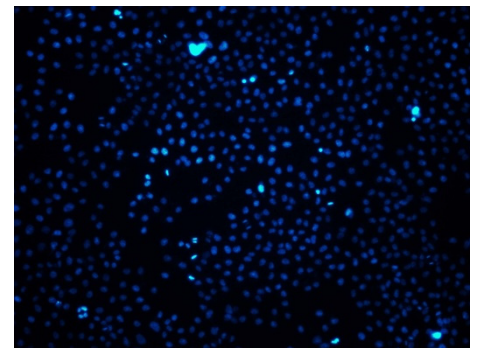

Dox-Bad3SA

Dox + ABT-737 (1  $\mu$ M)

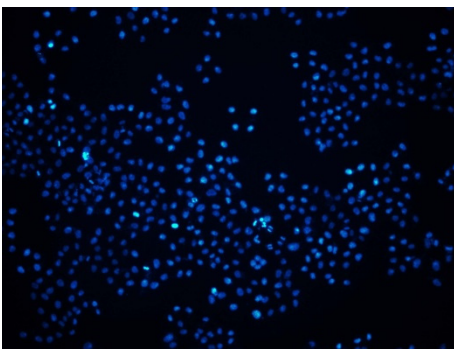

Dox-GFP

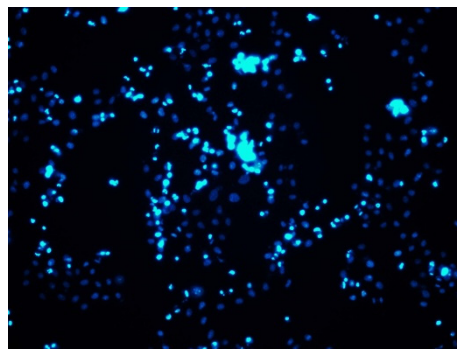

Dox-Noxa

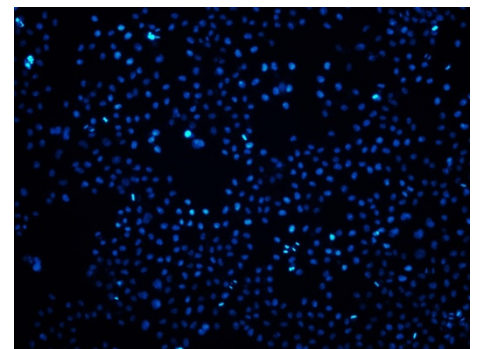

Dox-Bad3SA

Dox + **1h** (10  $\mu$ M)

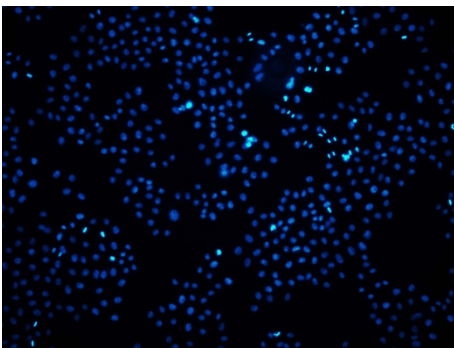

Dox-GFP

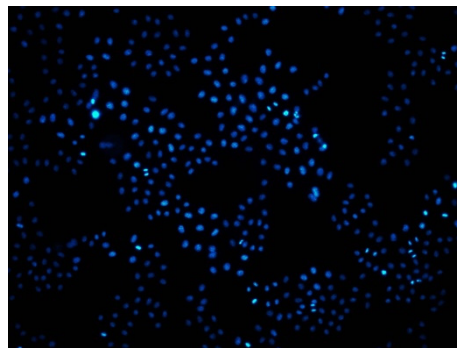

Dox-Noxa

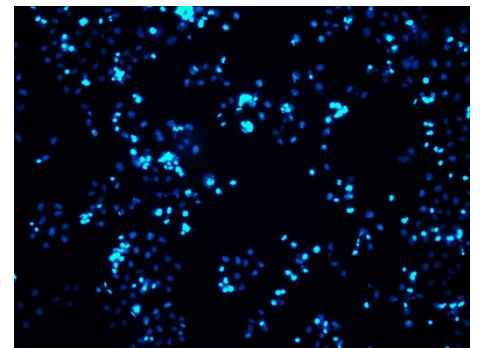

Dox-Bad3SA

**Figure S3.** Images corresponding to Figure 9

Untreated

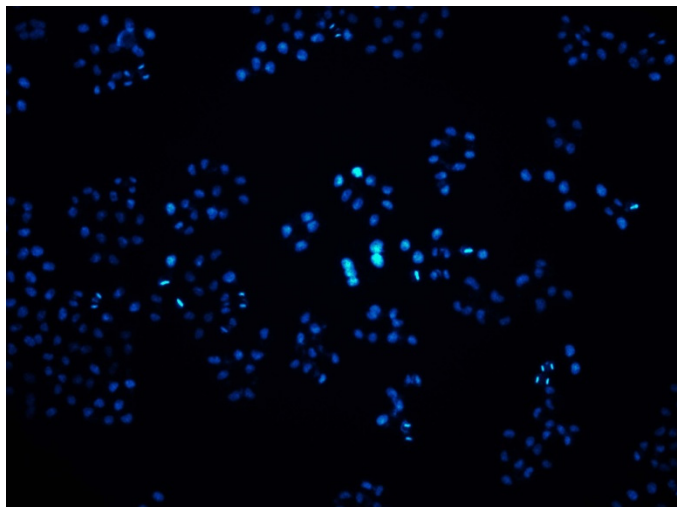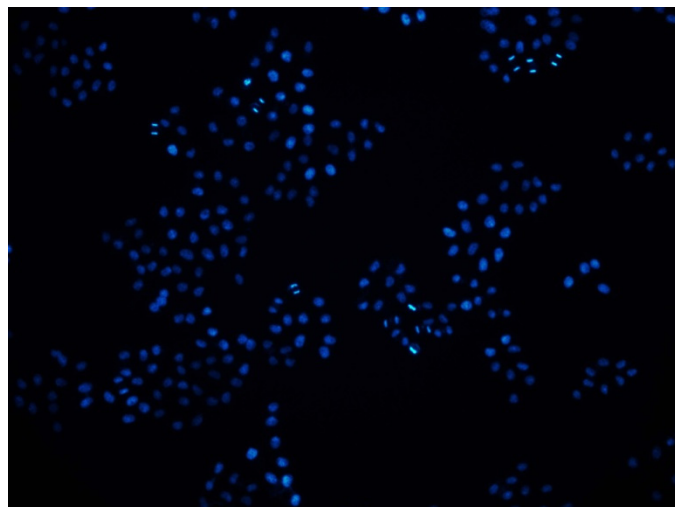

DMSO

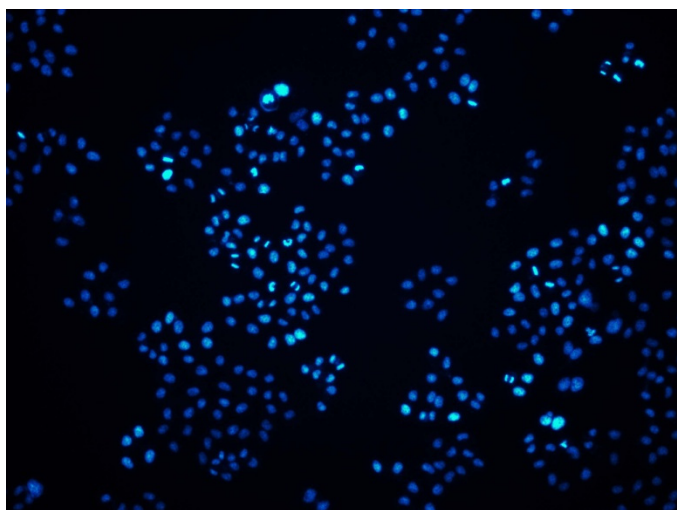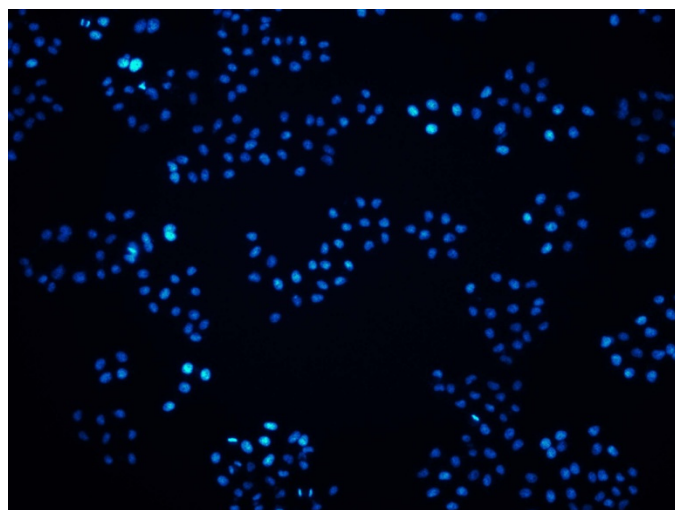

ABT-737 @ 1  $\mu$ M

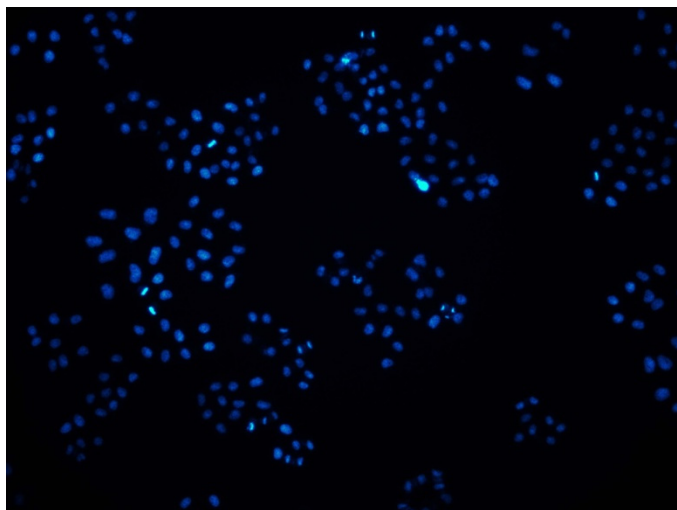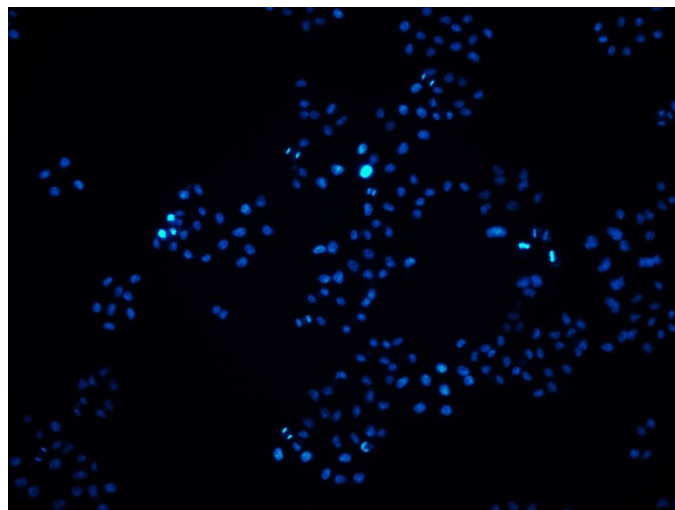



1h @ 1  $\mu$ M

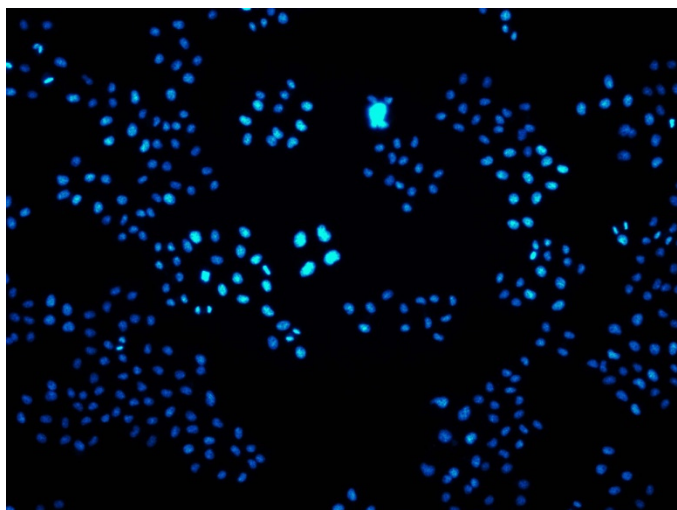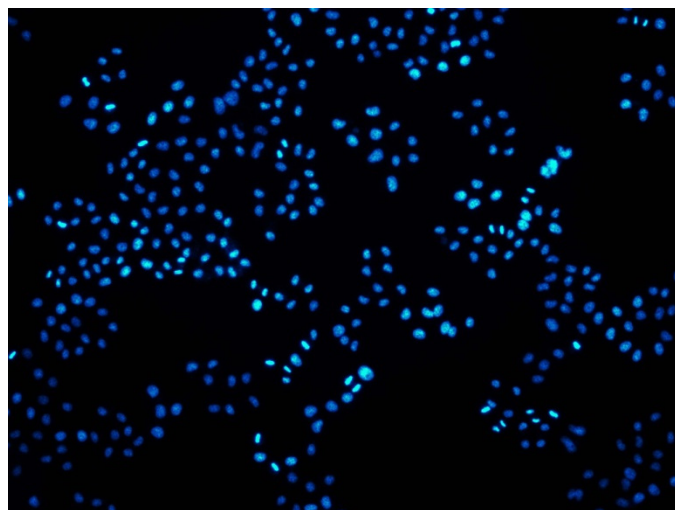

1h @ 5  $\mu$ M

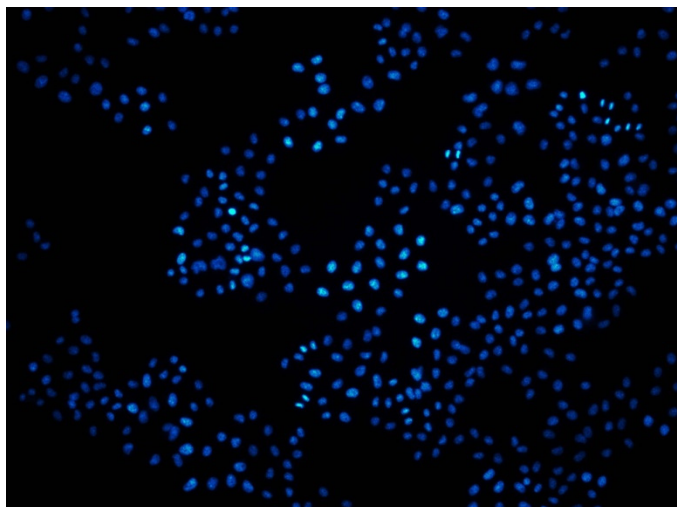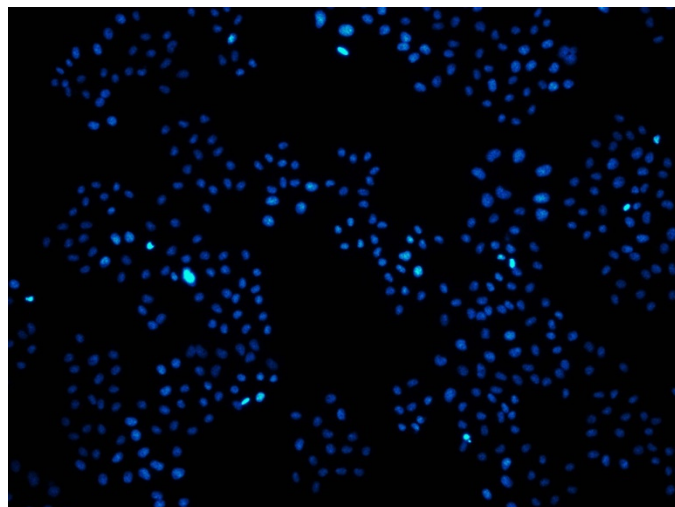

1h @ 10  $\mu$ M

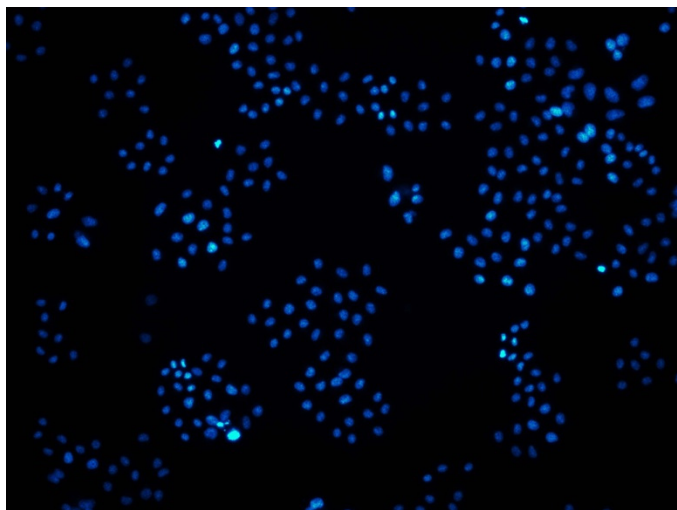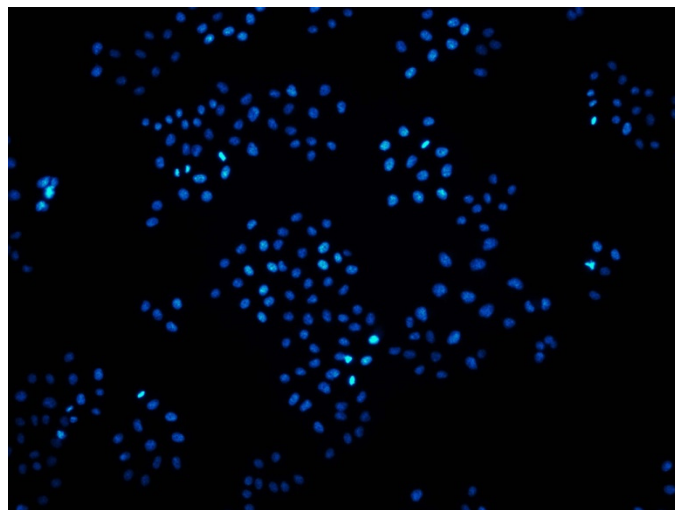



ABT-737 @ 1 $\mu$ M and 1h @ 1  $\mu$ M

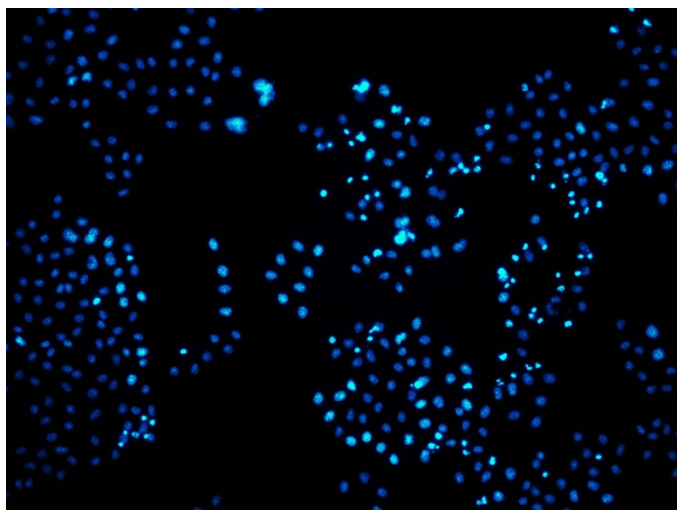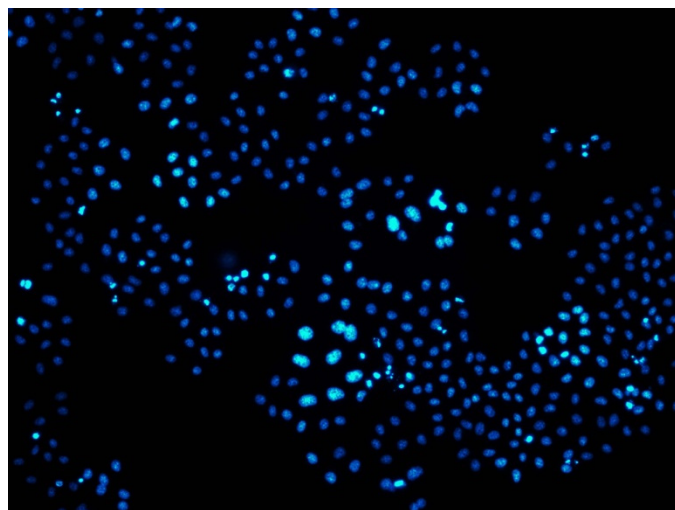

ABT-737 @ 1 $\mu$ M and 1h @ 5  $\mu$ M

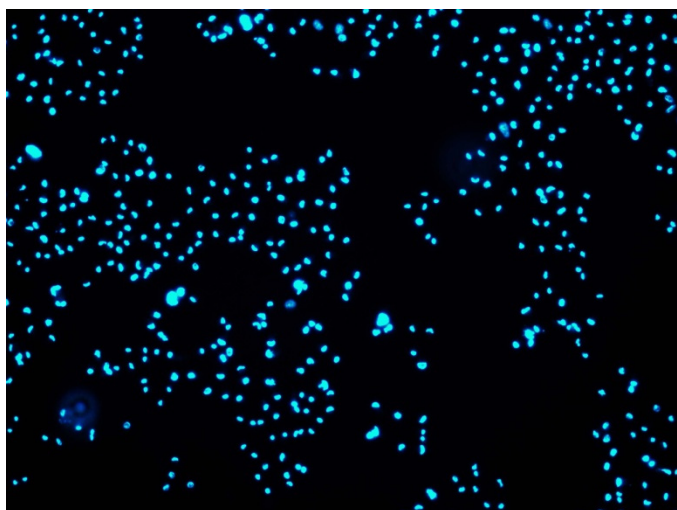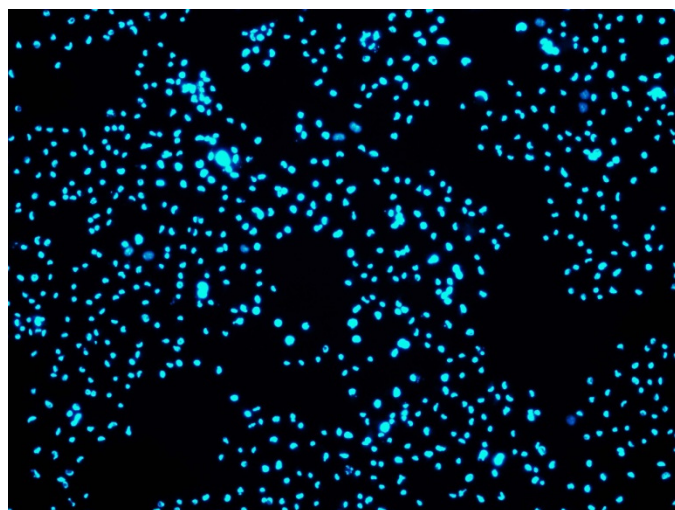

ABT-737 @ 1 $\mu$ M and 1h @ 10  $\mu$ M

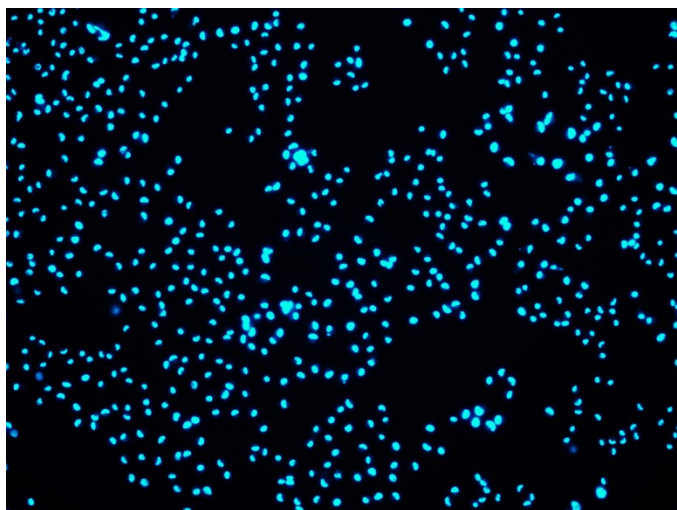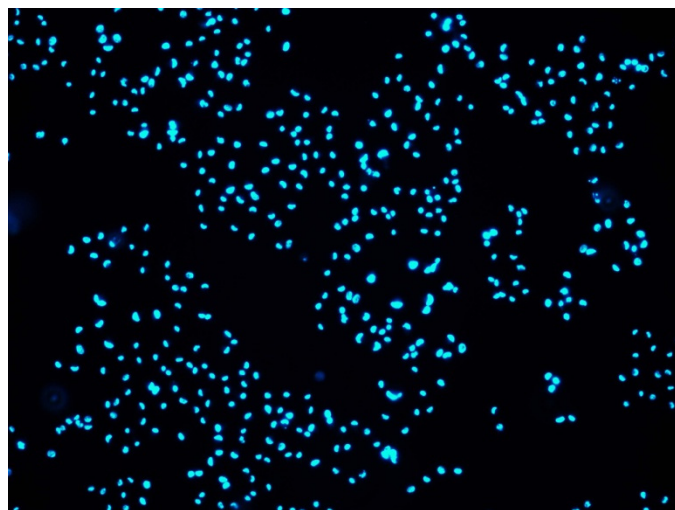

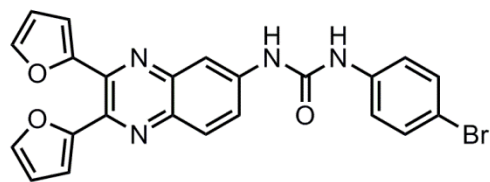

1h

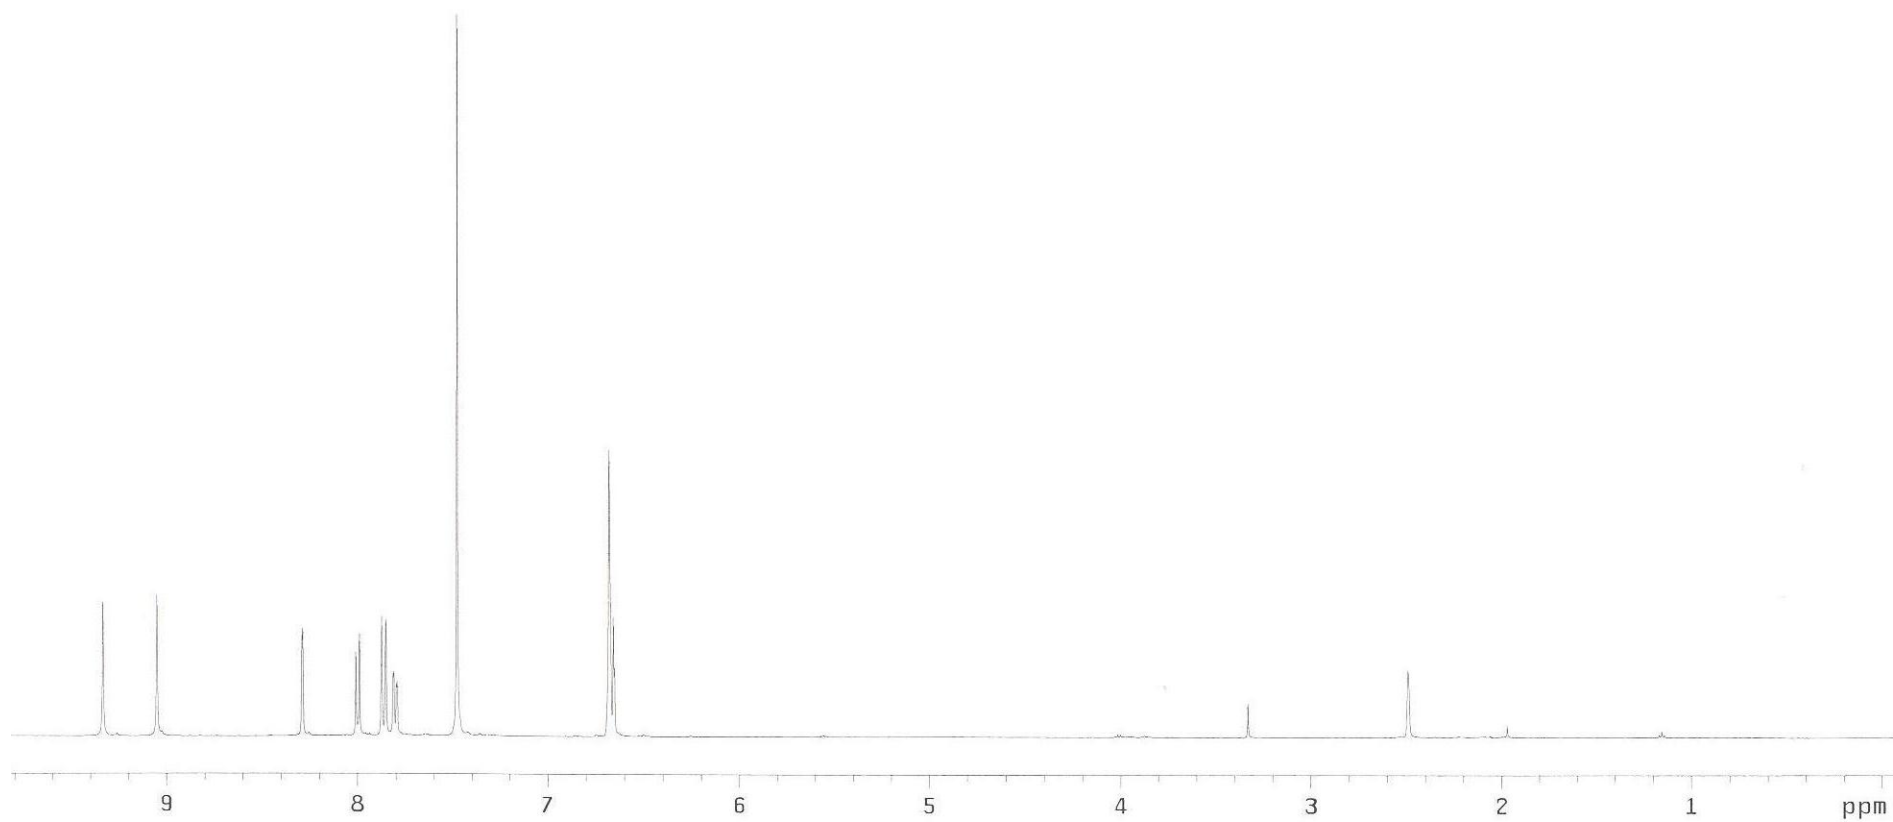

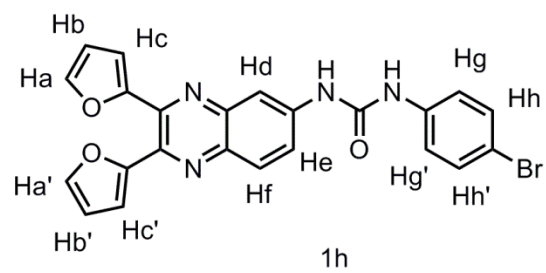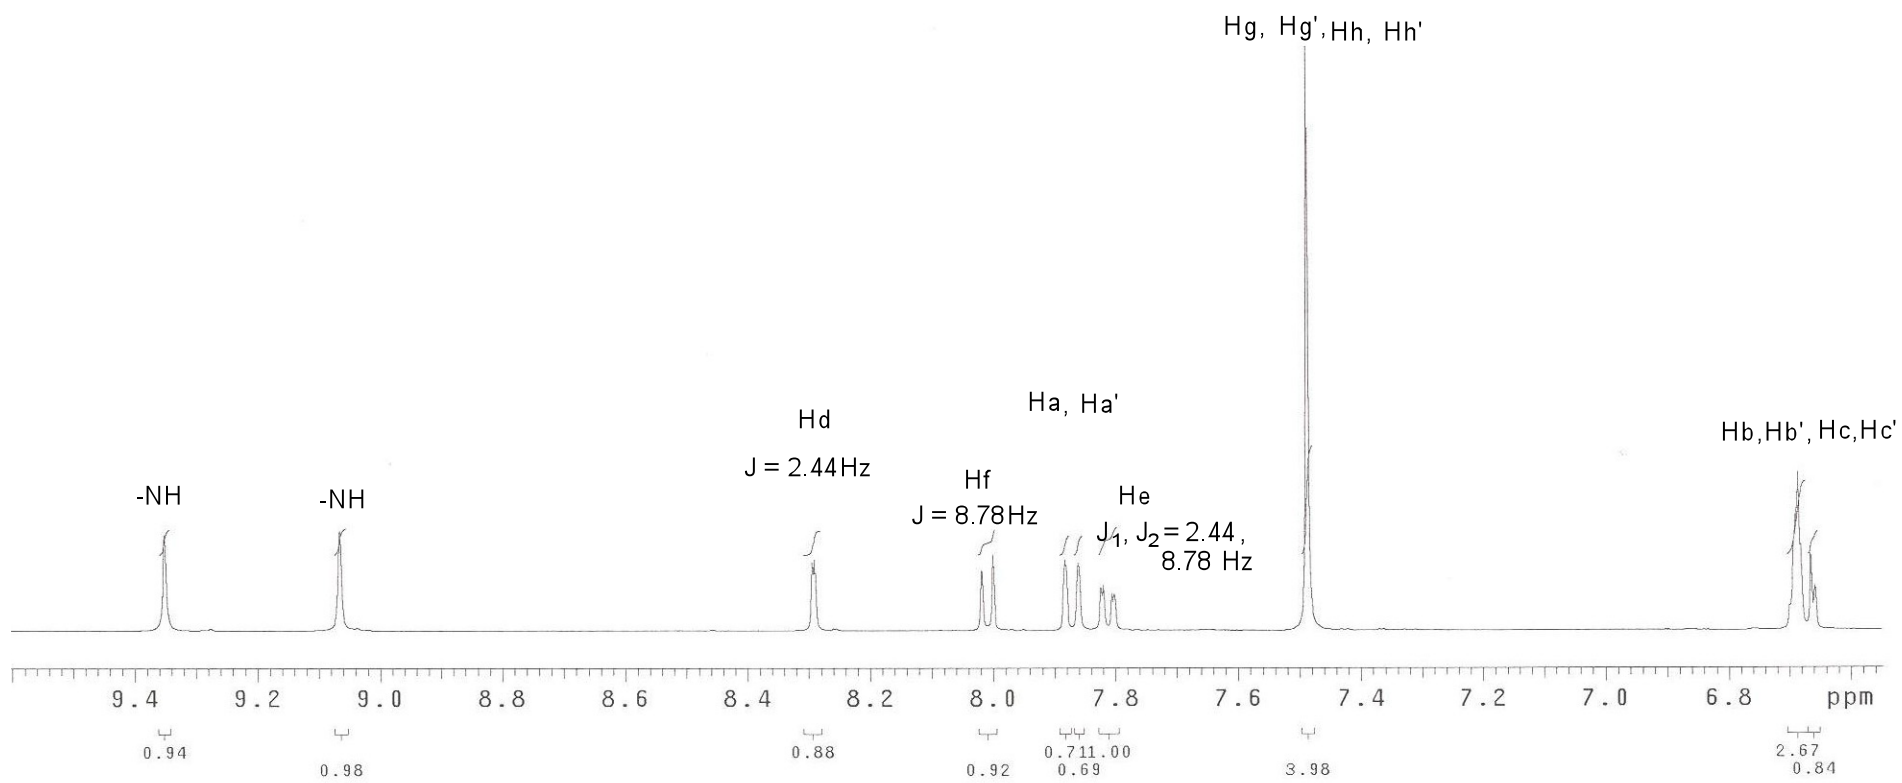



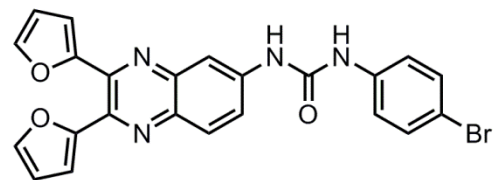

1h

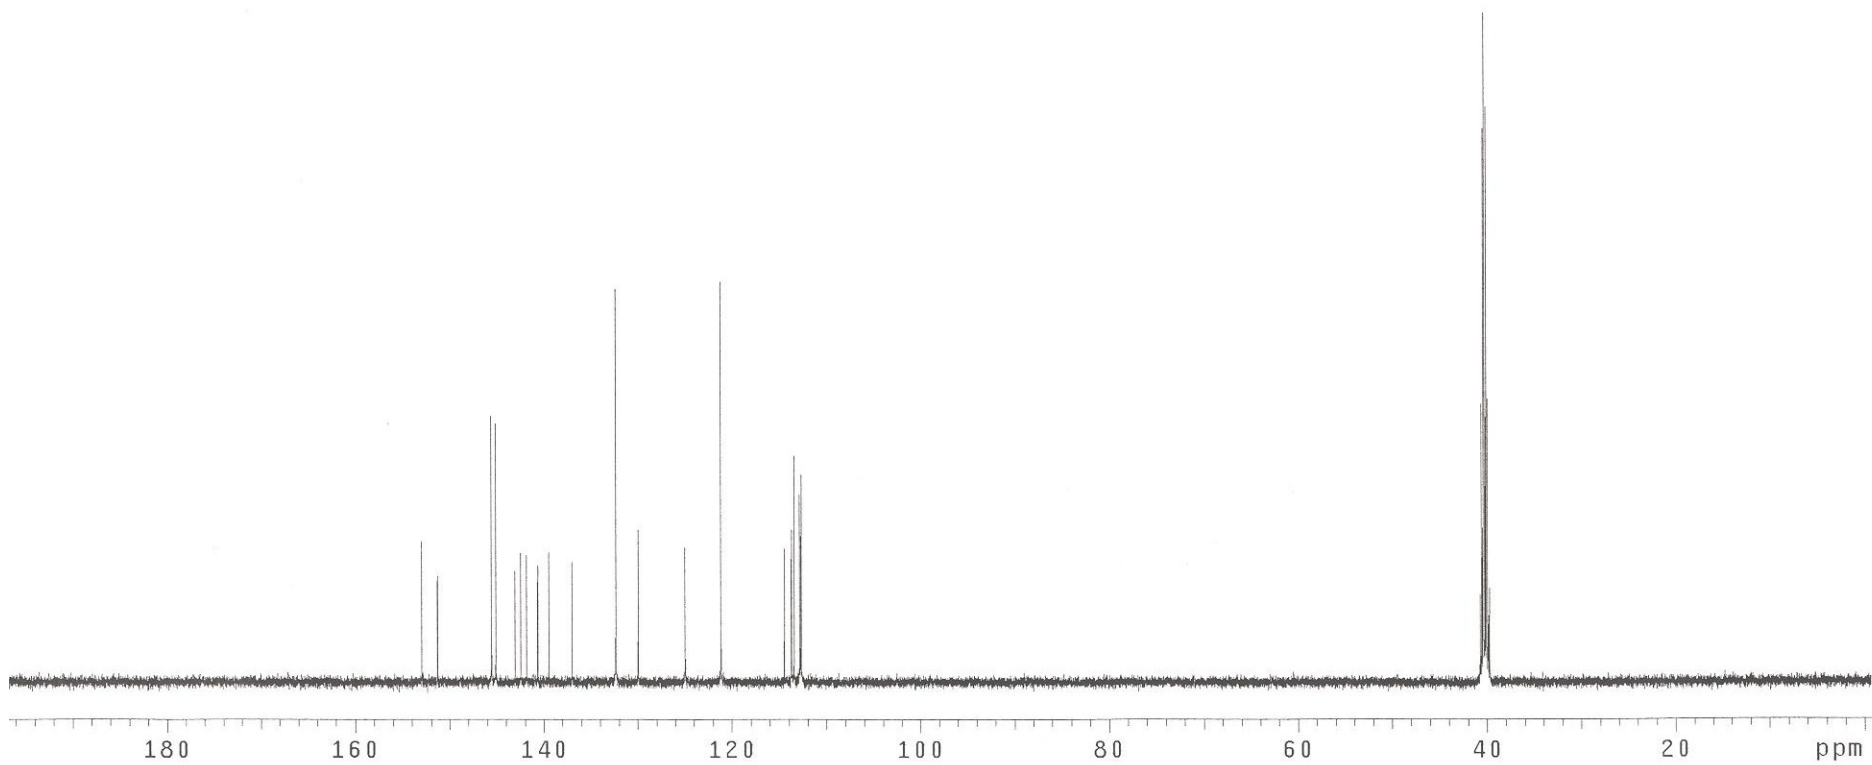

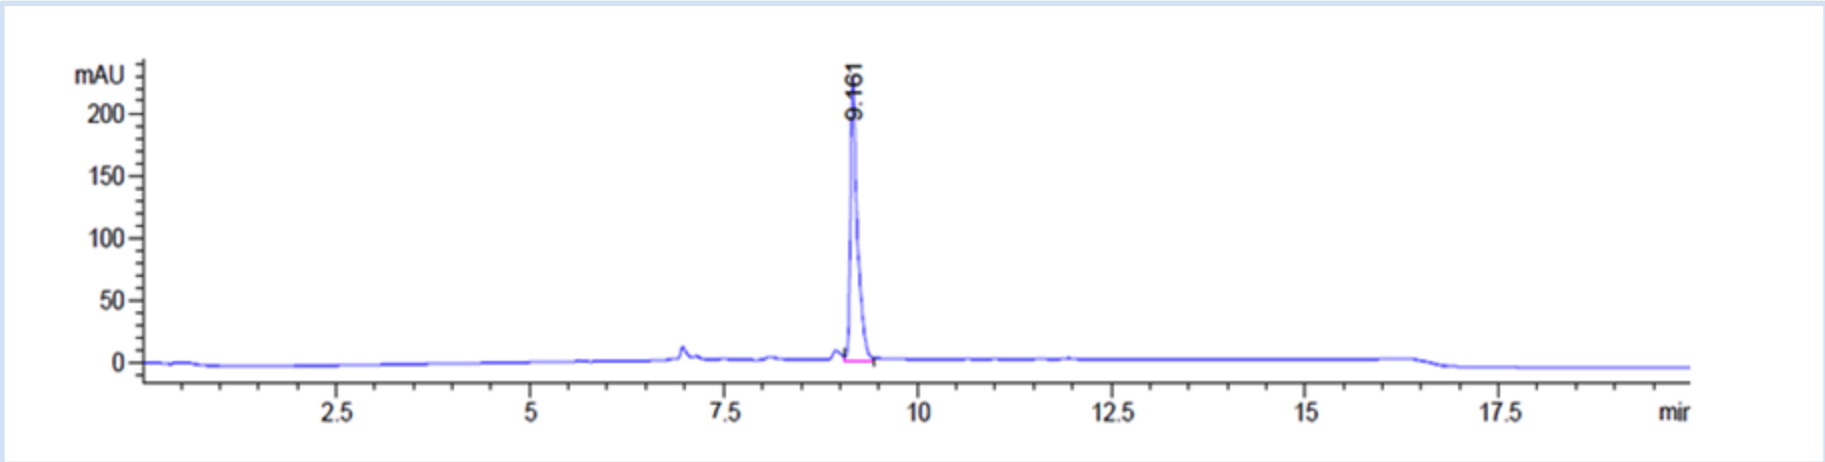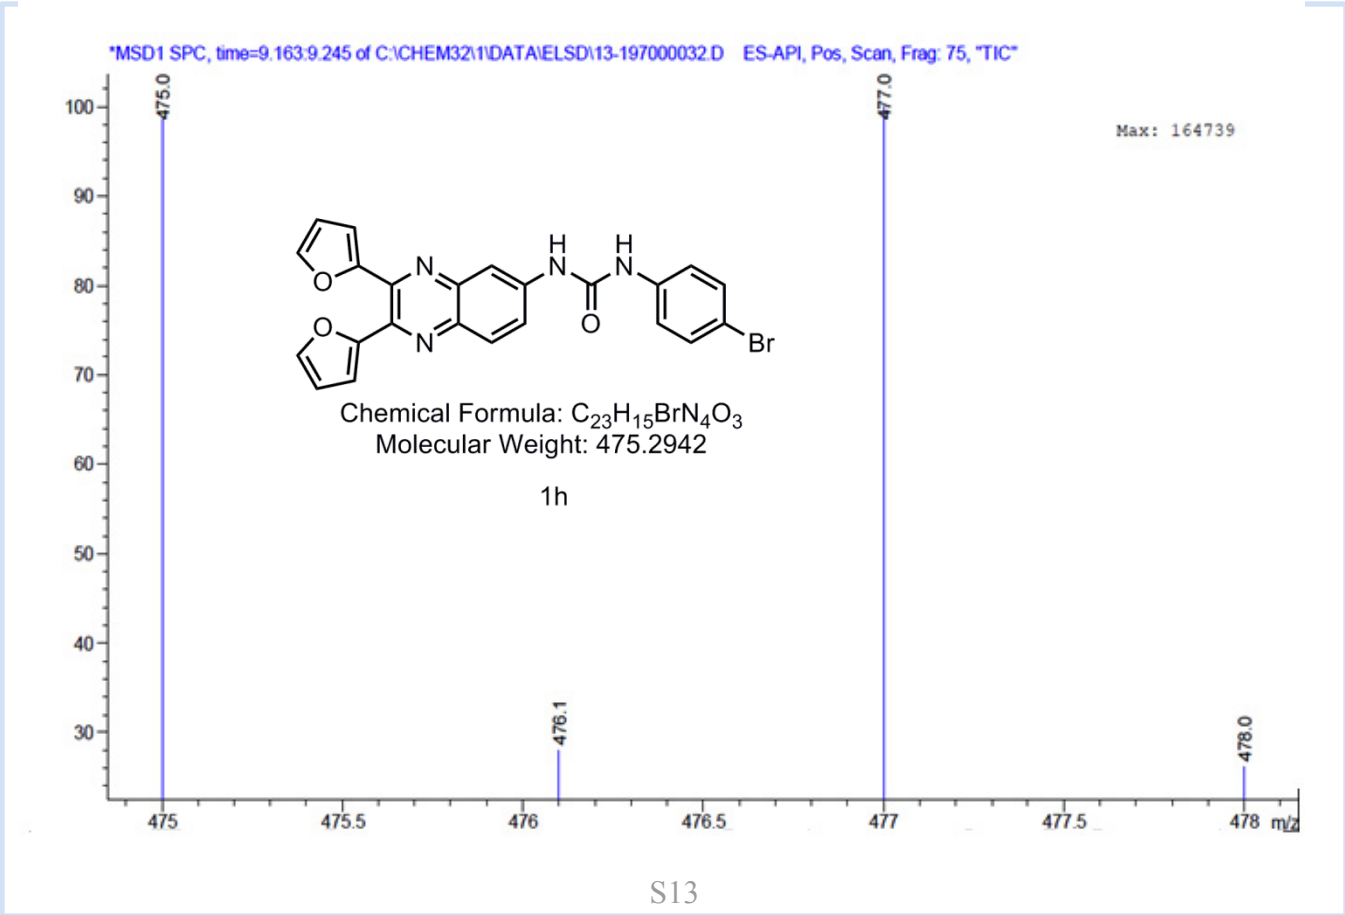

Supplement: NIHMS357928-supplement-01.pdf [file NIHMS357928-supplement-01.pdf]
